# Supplementary material for: Cortex cis-regulatory switches establish scale colour identity and pattern diversity in Heliconius
Source: eLife. 2021 Jul 19;10:e68549. doi: 10.7554/eLife.68549 (PMC8289415; doi:10.7554/eLife.68549)
Supplement: Figure 4—source data 2. [file elife-68549-fig4-data2.xlsx]

## Sheet: Sheet1
Figure 4 -Supplement table 2: : Sequences for guides yielding succesful phenotypes and associated genotyping primers
Species	sgRNA Name	Target Sequence (5' > 3')	Genotyping Primers (5' > 3')
Heliconius erato	Hera_Cort_gRNA_E2	GGGGCGCTACGAACCTATCT AGG	ATGATATTGAGTTTTGCTAAATCAAGCC
			GAGTGGCGGAATTCAACGCC
	Hera_Cort_gRNA_E4	GGCTCCTCCAACTCCATTTA TGG	CGAGTAAAAGTTCTCCTCTGGG
			CGTGTTGGTGGCRGCACTTG
	Hera_Cort_gRNA_E6	TGTGAGAGAAGCGATACTGC TGG	-
Heliconius melpomene	Hmel_Cort_gRNA_E2	GCGTTTCGCTGAAAGAATCTC GGG	TGTACATCAAAGGCCGCATG
			CCTCCGTTTCCCACTTTTCG
	Hmel_Cort_gRNA_E3	GGTCCAGAATGCTGTCTGCTG AGG	TTGCGTAGCTGTATGTAGGCA
			AAGCCTTCGATCTGGAGTCA
Danaus plexippus	087 Dp_cort_sgRNA1	AGTTAGGGTTCCGTACAAGG AGG	GCCTCTTAACTGCTCATAGAATGCAC
	088 Dp_cort_sgRNA2	TTGCGCGGAACACATGGCCA CGG	CCCCAAAAATACGCTAACTACTTG
	089 Dp_cort_sgRNA3	TTCTTCTTGCGCGGAACACA TGG
Heliconius melpomene CRE	Hmel_Dors_Del1	GCTGTAATATGTTGCATATA GGG	CGCTTACAGTCGCACTTTGT
	Hmel_Dors_Del2	GGGTATATTTTTCAATACTA AGG
	Hmel_Dors_Del3	ATAATACAGTATAACGTACG TGG	AATGTCGCCATGTGTACTCG
	Hmel_Dors_Del4	GGTGGCATGGCATGGTTCA TGG
Heliconius erato CRE	Hera_Peak5_1	ATTGGTTCTGCTCAGCGTAC TGG	CTTCAAAATGGAACGTCTCG
	Hera_Peak5_2	GATTACCCCGCCTCTTTGTA TGG	ATGCCATTTTCATGCACAAA
